# Supplementary material for: Extended Application of the CNOP-P method in the Inner Mongolia using the Common Land Model
Source: Copernicus journal article supplement (doi:10.5194/npg-2016-13), 2016-01-27
Supplement: Supplementary file [file npg-2016-13-EC2-supplement.pdf]

In view of the comments of the two referees, with which I agree, I consider the paper cannot be accepted for publication in NPG.

I thank the authors for having thought of *Nonlinear Processes in Geophysics* for submitting your paper, and I encourage them to write a new paper along the lines suggested by the referees.
